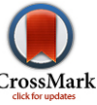

## Correction

# Correction: Enzymatic Sialylation of IgA1 O-Glycans: Implications for Studies of IgA Nephropathy

**The PLOS ONE Staff**

The following information is missing from the funding section: grants LH11046 (Ministry of Education, Youth, and Sport, Czech Republic) and CZ.1.07/2.3.00/20.0164 European Social Fund. The correct Funding statement is: This study was supported in part by the NIH grants DK078244, GM098539, and DK082753, and grants LH11046 (Ministry of Education, Youth, and Sport, Czech Republic) and CZ.1.07/2.3.00/20.0164 European Social Fund, and by a gift from the IGA Nephropathy Foundation of America. The funders had no role in study design, data collection and analysis, decision to publish, or preparation of the manuscript.

**Reference**

1. Takahashi K, Raska M, Stuchlova Horynova M, Hall SD, Poulsen K, et al. (2014) Enzymatic Sialylation of IgA1 O-Glycans: Implications for Studies of IgA Nephropathy. PLoS ONE 9(6): e99026. doi:10.1371/journal.pone.0099026

---

**Citation:** The PLOS ONE Staff (2014) Correction: Enzymatic Sialylation of IgA1 O-Glycans: Implications for Studies of IgA Nephropathy. PLoS ONE 9(11): e113577. doi:10.1371/journal.pone.0113577

**Published:** November 13, 2014

**Copyright:** © 2014 The PLOS ONE Staff. This is an open-access article distributed under the terms of the Creative Commons Attribution License, which permits unrestricted use, distribution, and reproduction in any medium, provided the original author and source are credited.
